# Supplementary material for: Circulating H3K27 Methylated Nucleosome Plasma Concentration: Synergistic Information with Circulating Tumor DNA Molecular Profiling
Source: Biomolecules. 2023 Aug 16;13(8):1255. doi: 10.3390/biom13081255 (PMC10452235; doi:10.3390/biom13081255)
Supplement: Supplementary file 1 [file biomolecules-13-01255-s001.zip]

Archive with 4 entries (4 files):
- GROLLEAU et al_Biomolecules_Additional Figures.pdf
- GROLLEAU et al_Table S1.xlsx
- GROLLEAU et al_Table S2.xlsx
- GROLLEAU et al_Table S3.xlsx
