# Supplementary material for: Circulating H3K27 Methylated Nucleosome Plasma Concentration: Synergistic Information with Circulating Tumor DNA Molecular Profiling
Source: Biomolecules. 2023 Aug 16;13(8):1255. doi: 10.3390/biom13081255 (PMC10452235; doi:10.3390/biom13081255)
Supplement: Supplementary file 1 [file biomolecules-13-01255-s001.zip › GROLLEAU et al_Table S1.xlsx]

## Sheet: Feuil1
Fold change	H3K27me3	H3K36me3	H3K9me3	H3K4me2
Training set	3.69211	1.8468	2.64096	1.06044
Validation set	2.93324	2.40726	2.72618	1.10105
