# Supplementary figures and images for: Circulating H3K27 Methylated Nucleosome Plasma Concentration: Synergistic Information with Circulating Tumor DNA Molecular Profiling
Source: MDPI journal article supplement (doi:10.3390/biom13081255), 2023-08-16

## ADDITIONAL FIGURES

Figure S1. A-B.

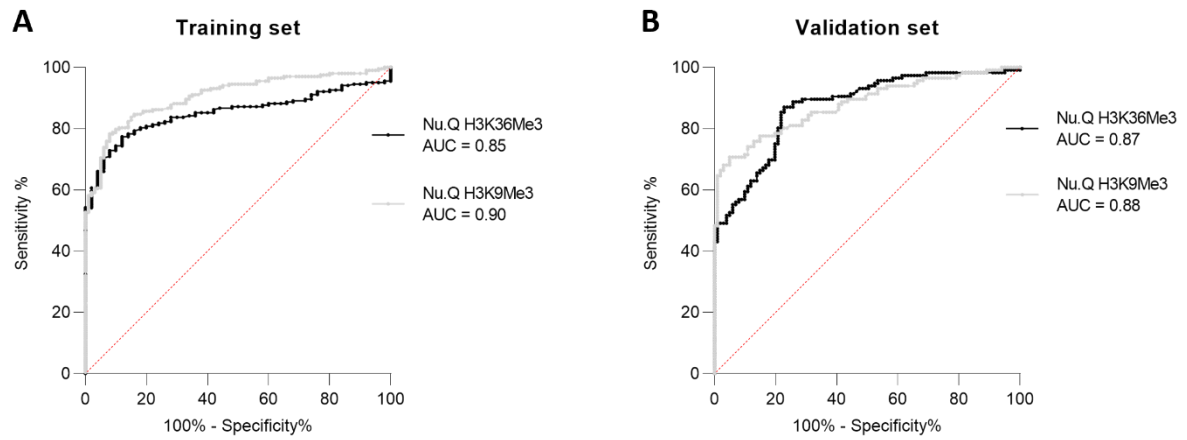

Figure S2.

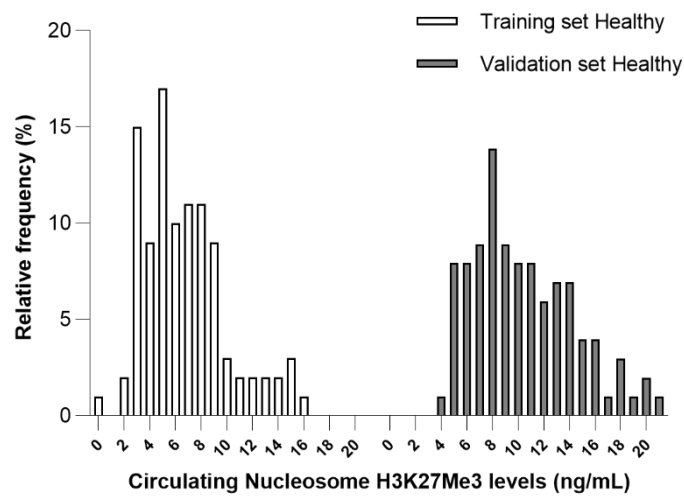

Supplement: s1 [file s1]
